# Supplementary material for: Experimental Infection of Brazilian Free-Tailed Bats (Tadarida brasiliensis) with Two Strains of SARS-CoV-2
Source: MDPI journal article supplement (doi:10.3390/v14081809), 2022-08-18
Supplement: s1 [file s1]

Supplemental Table S1: Complete histopathological findings and scoring system for control and inoculated bats

| Lesion                                                                             | #control | #treatment | Interpretation                                                                                                                                                                                                           | Additional Details on Treatment Bats with Lesion                                                                                                                                        |
|------------------------------------------------------------------------------------|----------|------------|--------------------------------------------------------------------------------------------------------------------------------------------------------------------------------------------------------------------------|-----------------------------------------------------------------------------------------------------------------------------------------------------------------------------------------|
| Prominent bronchus-associated lymphoid tissue (BALT)                               | 2/6      | 14/18      | Could suggest general immune stimulation                                                                                                                                                                                 | 8/9 Delta Bats, 6/9 WA01 Bats                                                                                                                                                           |
| Splenic lymphoid hyperplasia                                                       | 0/6      | 7/18       | Could suggest general immune stimulation                                                                                                                                                                                 | 5/9 Delta, 2/9 WA01 Bats                                                                                                                                                                |
| Stomatitis, erosive to ulcerative                                                  | 0/6      | 3/18       | Suspected irritation from swabbing                                                                                                                                                                                       | Delta Bat 4 (Delta), Delta Bat 5 (Delta), and Delta Bat 9 (Delta) all survived to planned euthanasia time points. Bats Delta 4 and Delta 5 also had non-negative Ct values for lung PCR |
| Interstitial pneumonia                                                             | 3/6      | 1/18       | Control bats all died or were euthanized within 14 days of capture. Results in control bats were consistent with ill thrift, poor intakes, parasitism, and bacteremia. No apparent association with SARS-CoV-2 infection | Bat 1B (WA01) survived until 28 dpi. This bat performed well in captivity and had abundant fat stores at the time of euthanasia                                                         |
| Tracheitis/pharyngitis, mild, suppurative                                          | 1/6      | 0/18       | Control bats all died or were euthanized within 14 days of capture. Results are consistent with ill thrift, poor intakes, parasitism, and bacteremia                                                                     | n/a                                                                                                                                                                                     |
| Splenic lymphoid depletion                                                         | 0/6      | 1/18       | Ill thrift                                                                                                                                                                                                               | Bat 2 (WA01) died at 3 dpi due to ill thrift                                                                                                                                            |
| Hepatocellular necrosis, multifocal, random, with multifocal suppurative hepatitis | 0/6      | 1/18       | Ill thrift                                                                                                                                                                                                               | Delta Bat 6 (Delta) was found dead 14 dpi due to ill thrift                                                                                                                             |

|                                                              |     |      |                                                                                                                                                                     |                                                                                                                                                                                                                                                                        |
|--------------------------------------------------------------|-----|------|---------------------------------------------------------------------------------------------------------------------------------------------------------------------|------------------------------------------------------------------------------------------------------------------------------------------------------------------------------------------------------------------------------------------------------------------------|
| Nasal turbinates, intraluminal mucinous debris               | 0/6 | 2/18 | Findings likely attributed to ill thrift and secondary infections                                                                                                   | Delta Bat 3 (Delta) was found dead 14 dpi due to ill thrift. Delta Bat 6 (Delta) was found dead 14 dpi due to ill thrift                                                                                                                                               |
| Gastric erosions with bile staining of mucosa                | 3/6 | 1/18 | Low intakes. Affected bats all died or were euthanized within (x) days of capture. Results are consistent with ill thrift, poor intakes, parasitism, and bacteremia | Delta Bat 3 (Delta) was found dead 14 dpi due to ill thrift                                                                                                                                                                                                            |
| Intestinal coccidiosis                                       | 1/6 | 1/18 | Parasitism common in free-ranging bats                                                                                                                              | Bat 2 (WA01) died at 3 dpi due to ill thrift                                                                                                                                                                                                                           |
| Intestinal nematodiasis                                      | 1/6 | 0/18 | Parasitism common in free-ranging bats                                                                                                                              | n/a                                                                                                                                                                                                                                                                    |
| Biliary trematodiasis                                        | 1/6 | 0/18 | Parasitism common in free-ranging bats                                                                                                                              | n/a                                                                                                                                                                                                                                                                    |
| Colonic trematodiasis                                        | 1/6 | 0/18 | Parasitism common in free-ranging bats                                                                                                                              | n/a                                                                                                                                                                                                                                                                    |
| Gastritis, ulcerative multifocal, +/- intraluminal trematode | 2/6 | 2/18 | Parasitism common in free-ranging bats                                                                                                                              | Bat 7 (WA01) was found dead 2 dpi due to ill thrift Delta Bat 6 (Delta) was found 14 dpi due to ill thrift                                                                                                                                                             |
| Intestinal trematodiasis                                     | 0/6 | 2/18 | Parasitism common in free-ranging bats                                                                                                                              | Bat 7 (WA01) was found dead 2 dpi due to ill thrift. Bat 3B (WA01) survived until 28 dpi. This bat performed well in captivity and had abundant fat stores at the time of euthanasia and hydropic degeneration in the liver. No lesions were observed in other organs. |
| Hepatic centrilobular to panlobular hydropic degeneration    | 0/6 | 3/18 | Findings are consistent with excessive fat stores                                                                                                                   | These bats performed well in captivity and had abundant fat stores at the time of euthanasia and hydropic degeneration in the liver. No lesions were observed in other organs.                                                                                         |
| Abundant subcutaneous adipose tissue/obesity                 | 0/6 | 5/18 | Findings are consistent with excessive fat stores                                                                                                                   | These bats performed well in captivity and had abundant fat stores at the time of euthanasia +/- hydropic degeneration in the liver. No lesions were observed in other organs.                                                                                         |

Supplemental Table S2: Bat Oral Swab PCR CT values.

| <b>Bat ID</b> | <b>1 DPI</b> | <b>2 DPI</b> | <b>3 DPI</b> | <b>4 DPI</b> | <b>5 DPI</b> | <b>7 DPI</b> |
|---------------|--------------|--------------|--------------|--------------|--------------|--------------|
| Bat 1         | 32.507       | 32.363       | 30.172       | NT           | NT           | NT           |
| Bat 2         | 33.419       | 34.093       | 31.302       | NT           | NT           | NT           |
| Bat 3         | 27.102       | 35.131       | 33.234       | NT           | NT           | NT           |
| Bat 5         | Undetermined | 32.832       | 34.018       | 32.328       | 31.765       | 32.312       |
| Bat 6         | 30.099       | 32.370       | 29.341       | NT           | NT           | NT           |
| Bat 7         | 31.167       | 33.077       | NT           | NT           | NT           | NT           |
| Bat 8         | 32.030       | 31.476       | 35.079       | 32.798       | 32.277       | 30.577       |
| Bat 9         | 29.770       | 33.619       | 32.535       | 32.778       | 32.799       | 31.357       |
| Bat 10        | 32.593       | 33.435       | 32.558       | 33.229       | 32.919       | 31.628       |
| Bat 1D        | 32.766       | 32.405       | 33.908       | 34.003       | 34.356       | 35.941       |
| Bat 2D        | 32.735       | 34.224       | 33.642       | 33.624       | 34.436       | 33.578       |
| Bat 3D        | Undetermined | 34.851       | 35.778       | Undetermined | 34.315       | 34.549       |
| Bat 4D        | 31.682       | 32.769       | 33.409       | NT           | NT           | NT           |
| Bat 5D        | Undetermined | 34.400       | 35.912       | 34.842       | 33.854       | 34.773       |
| Bat 6D        | 34.667       | 32.731       | 34.813       | 37.080       | Undetermined | 35.216       |
| Bat 7D        | 34.047       | 32.290       | 32.808       | NT           | NT           | NT           |
| Bat 8D        | 32.471       | 32.854       | 40.866       | NT           | NT           | NT           |
| Bat 9D        | 39.327       | 32.888       | 36.100       | 33.217       | 37.305       | 31.750       |

NT = Not tested
